# THE AMERICAN JOURNAL OF PSYCHIATRY

---

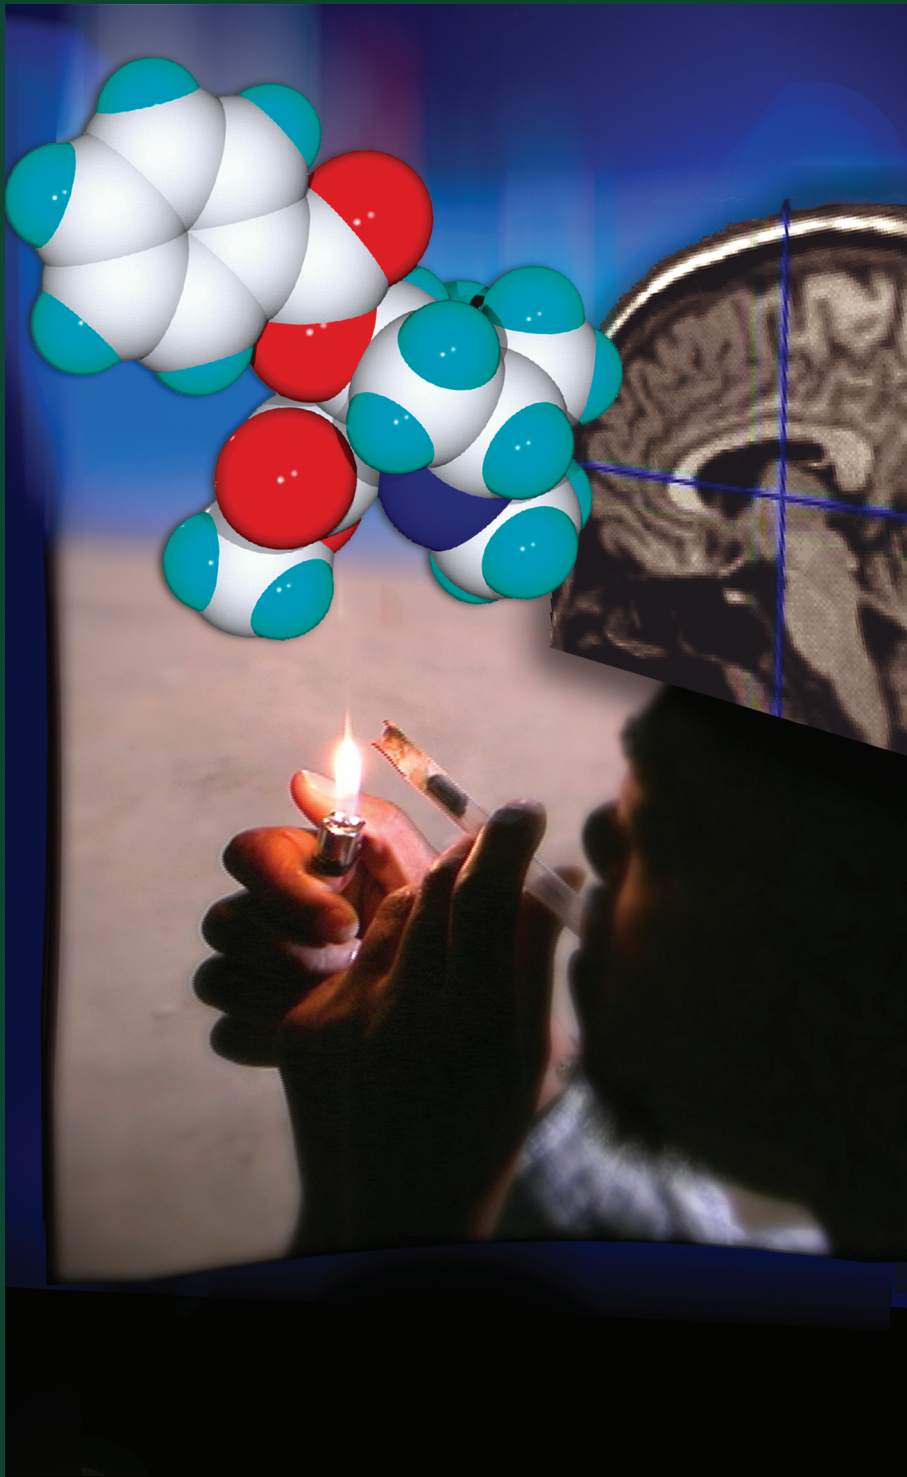

**Is Decreased Prefrontal Cortical Sensitivity to Monetary Reward Associated With Impaired Motivation and Self-Control in Cocaine Addiction?**  
Rita Z. Goldstein et al. 43

**Treatment of Acute Posttraumatic Stress Disorder With Brief Cognitive Behavioral Therapy: A Randomized Controlled Trial**  
Marit Sijbrandij et al. 82

**Cognitive Behavior Therapy and Paroxetine in the Treatment of Hypochondriasis: A Randomized Controlled Trial**  
Anja Greeven et al. 91

**Perceived Coercion and Change in Perceived Need for Admission in Patients Hospitalized for Eating Disorders**  
Angela S. Guarda et al. 108

**Continuing Medical Education** 182

**January 2007**

**Volume 164 • Number 1**

---

Official Journal of the  
AMERICAN PSYCHIATRIC ASSOCIATION

---

[ajp.psychiatryonline.org](http://ajp.psychiatryonline.org)
