# THE AMERICAN JOURNAL OF PSYCHIATRY

---

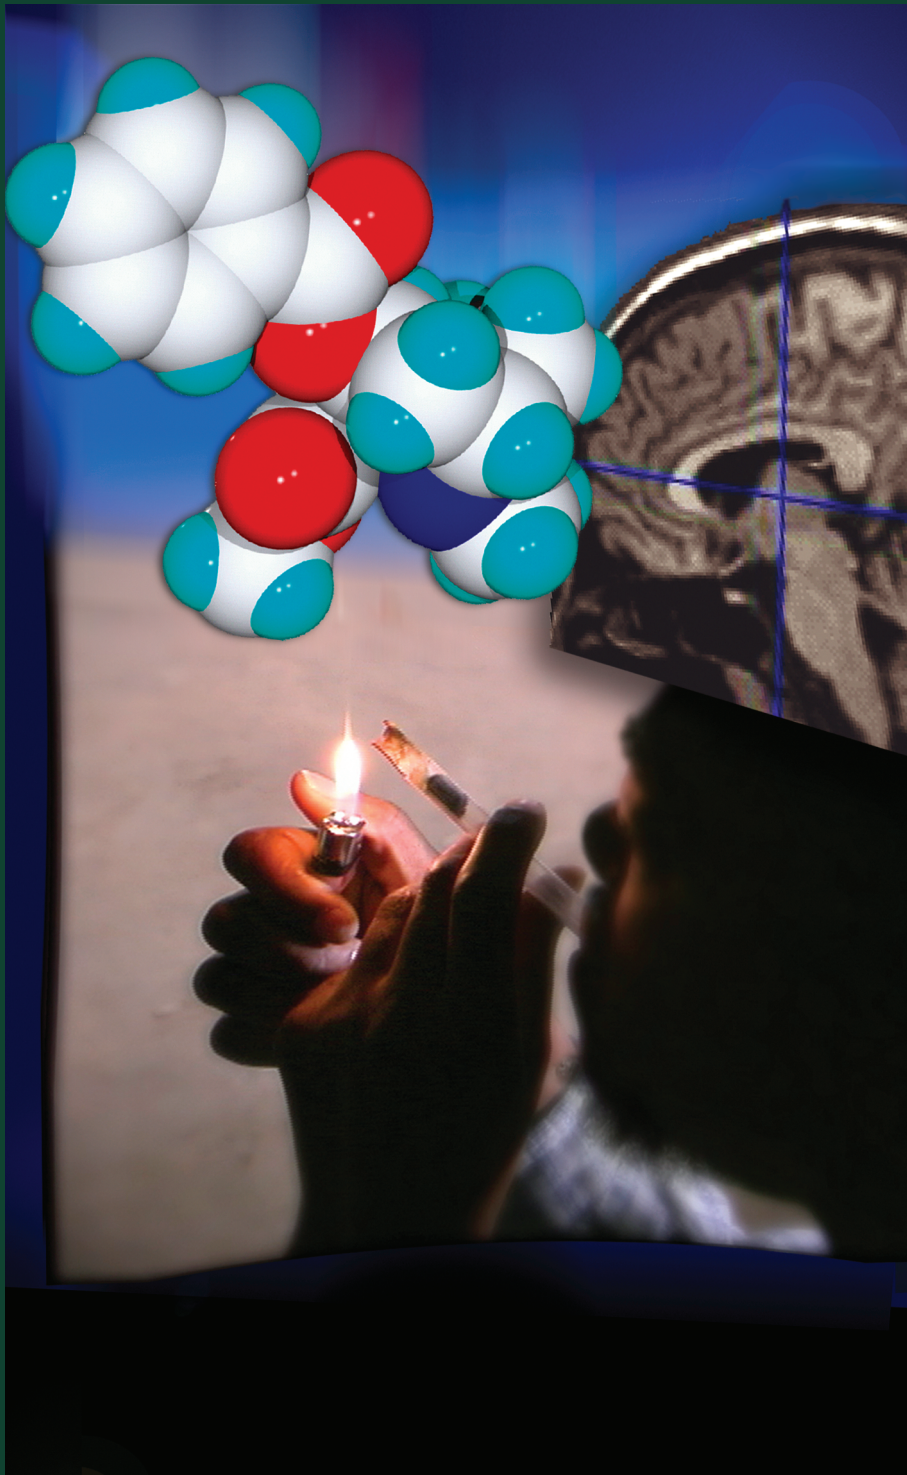

**Is Decreased Prefrontal Cortical Sensitivity to Monetary Reward Associated With Impaired Motivation and Self-Control in Cocaine Addiction?**  
Rita Z. Goldstein et al. 43

**Treatment of Acute Posttraumatic Stress Disorder With Brief Cognitive Behavioral Therapy: A Randomized Controlled Trial**  
Marit Sijbrandij et al. 82

**Cognitive Behavior Therapy and Paroxetine in the Treatment of Hypochondriasis: A Randomized Controlled Trial**  
Anja Greeven et al. 91

**Perceived Coercion and Change in Perceived Need for Admission in Patients Hospitalized for Eating Disorders**  
Angela S. Guarda et al. 108

**Continuing Medical Education** 182

**January 2007**

**Volume 164 • Number 1**

---

Official Journal of the  
AMERICAN PSYCHIATRIC ASSOCIATION

---

[ajp.psychiatryonline.org](http://ajp.psychiatryonline.org)

# THE AMERICAN JOURNAL OF PSYCHIATRY

Official Journal of the American Psychiatric Association

## Instructions for Activating Your Online Subscription

All subscribers to the print edition of *The American Journal of Psychiatry* are automatically eligible to view the *Journal* online. The online version of the *Journal* allows you to conduct searches for topics of interest in issues going all the way back to 1844. Plus the only way readers can participate in the *Journal's* new CME Course program is to have an activated online subscription (note: there is an additional annual fee to be enrolled and eligible to receive up to 36 hours of category 1 CME credit).

To activate your online subscription:

Make sure you have your customer identification number available. This number is printed on your *Journal* mailing label, directly above your name and address. If you cannot locate this number, please contact American Psychiatric Publishing, Inc., through one of the following methods:

- e-mail: [accessnumber@psych.org](mailto:accessnumber@psych.org)
- phone: (800) 368-5777
- fax: (703) 907-1091
- mail:

American Psychiatric Publishing, Inc.  
1000 Wilson Blvd., Suite 1825  
Arlington, VA 22209-3901  
Attn: Circulation Department.

Internet: <http://www.psychiatryonline.org>. Click on the "Subscriptions" button located near the bottom of the page. Then click on the appropriate link:

- ACTIVATE Your Member or Individual (Nonmember) Subscription

For APA Members, you will find your member number on the mailing label above your name. It is

a 10-digit number beginning with zeros. Enter your number in the box and click the SUBMIT button.

For Individual Nonmembers and Institutions, your customer number is on the mailing label above your name. It is a 10-digit number beginning with 22 or 30. Enter this number in the box and click the SUBMIT button.

Fill out all the information on the next screen and press the "Send Form" button at the bottom on the right.

When finished, click the "Done" button. You will receive an e-mail confirmation that your subscription has been activated.

**Continuing Medical Education:** You now have an opportunity to earn CME credits by reading articles in *The American Journal of Psychiatry*. Three articles in each issue will each comprise a short course for up to 1 hour category 1 CME credit each. The course comprises reading the article and answering three multiple-choice questions with a single correct answer. CME Credit is issued only online. Readers who want credit must subscribe to the AJP Continuing Medical Education Course program (APA Members: \$97.00 per year; Nonmember subscribers: \$144.00 per year; nonmember nonsubscribers: \$180.00 per year). Go to [cme.psychiatryonline.org](http://cme.psychiatryonline.org), select *The American Journal of Psychiatry* at that site, take the course(s) of your choosing, complete the evaluation form, and submit your answers for CME credit. In the online course, correct answers will be highlighted for your reference; there is no minimum threshold score necessary for the credit. A link from the question to the correct answer in context will be highlighted in the associated article. A certificate for each course will be generated upon successful completion.

The American Journal of Psychiatry is online at [ajp.psychiatryonline.org](http://ajp.psychiatryonline.org)

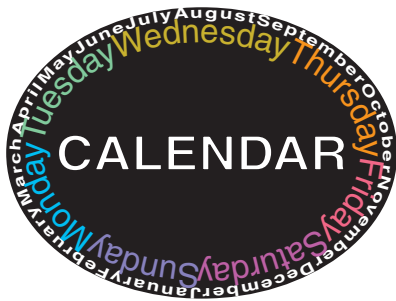

For free listing of your organization's official annual or regional meeting, please send us the following information: sponsor, location, inclusive dates, type and number of continuing education credits (if available), and the name, address, and telephone number of the person or group to contact for more information. In order for an event to appear in our listing, all notices and changes must be received at least 6 months in advance of the meeting and should be addressed to:

Calendar, American Journal of Psychiatry, 1000 Wilson Boulevard, Suite 1825, Arlington, VA 22209-3901, [jblair@psych.org](mailto:jblair@psych.org) (e-mail).

Because of space limitations, only listings of meetings of the greatest interest to Journal readers will be included.

## FEBRUARY

**February 17–20**, 18th Annual Meeting of American Neuropsychiatric Association, Tucson, AZ. Contact: American Neuropsychiatric Association, 700 Ackerman Road, Suite 625, Columbus, Ohio 43202; (614) 447-2077 (tel), [anpa@osu.edu](mailto:anpa@osu.edu) (e-mail), [www.anpaonline.org](http://www.anpaonline.org) (web-site).

**February 19–23**, 16th Annual Psychopharmacology Review, Tucson, AZ. Contact: Professional Development Office, University of Arizona College of Medicine, Department of Psychiatry, PO Box 245002, 1501 N Campbell, #7423, Tucson, AZ 85724-5002; (520) 626-1392 (tel), (520) 626-5732 (fax), [uapsycon@email.arizona.edu](mailto:uapsycon@email.arizona.edu) (e-mail), [www.psychiatry.arizona.edu](http://www.psychiatry.arizona.edu) (web site).

**February 21–25**, Annual meeting of the American College of Psychiatrists, Rancho Mirage, California. Contact: American College of Psychiatrists, 122 S. Michigan Ave., Ste. 1360, Chicago, IL 60603; (312) 662-1020 (tel), (312) 662-1025 (fax), [maureen@acpsych.org](mailto:maureen@acpsych.org) (e-mail).

**February 22–23**, The British Neuropsychiatry Association 20th Anniversary Annual Meeting: Neuropsychiatry and Neuroscience, Epilepsy and Parkinson's Disease, London. Contact: Jackie Ashmenall, St Aidan, Ealing Green, Ealing, London W5 5EN; [jashmenall@yahoo.com](mailto:jashmenall@yahoo.com) (e-mail).

## MARCH

**March 1–4**, 20th Annual Meeting of the American Association for Geriatric Psychiatry, New Orleans. Contact: AAGP, 7910 Woodmont Ave., Ste. 1050, Bethesda, MD 20814-3004; (301) 654-7850 (tel), (301) 654-4137 (fax), [www.aagp-meeting.org](http://www.aagp-meeting.org) (web site).

**March 17–21**, 15th European Congress of Psychiatry, Madrid. Contact: Kenes In-

ternational – Global Congress Organisers and Association Management Services, 17 Rue du Cendrier, PO Box 1726, CH-1211 Geneva 1, Switzerland; (41) 22 908 0488 (tel), (41) 22 732 2850 (fax), [aep2007@kenes.com](mailto:aep2007@kenes.com) (e-mail), [www.kenes.com/aep2007](http://www.kenes.com/aep2007) (web site).

**March 30-Apr 1**, 33rd Annual American Academy of Clinical Psychiatrists Conference, Washington, DC. Contact: American Academy of Clinical Psychiatrists, P.O. Box 458, Glastonbury, CT 06033-0458; (860) 833-5045 (tel), (860) 833-6023 (fax), [aacp@cox.net](mailto:aacp@cox.net) (e-mail), [www.aacp.com](http://www.aacp.com) (web-site).

## APRIL

**April 18–21**, 28th Annual Meeting and Scientific Sessions of the Society of Behavioral Medicine, Miami Beach. Contact: Society of Behavioral Medicine, 17000 Commerce Parkway, Ste. C, Mount Laurel, NJ 08054; (856) 439-1297 (tel), (856) 439-0525 (fax), [info@sbm.org](mailto:info@sbm.org) (e-mail).

**April 26–29**, 25th Annual Symposium of the American College of Forensic Psychiatry, Santa Fe, NM. Contact: American College of Forensic Psychiatry, P.O. Box 5870, Balboa Island, CA 92662; (949) 673-7773 (tel), (949) 673-7710 (fax), [psychlaw@sover.net](mailto:psychlaw@sover.net) (e-mail), [www.forensicpsychonline.com](http://www.forensicpsychonline.com) (web site).

## MAY

**May 17–20**, The 51st Annual Meeting of the American Academy of Psychoanalysis and Dynamic Psychiatry, San Diego. Contact: Executive Office, American Academy of Psychoanalysis and Dynamic Psychiatry, P. O. Box 30, Bloomfield, CT 06002; (888) 691-8281 (tel), (888) 286-0787 (fax), [aap@ssmgt.com](mailto:aap@ssmgt.com) (e-mail), [www.aapdp.org](http://www.aapdp.org) (web site).

**May 19–24**, 160th Annual Meeting of

the American Psychiatric Association, San Diego. Contact: Cathy Nash, APA Annual Meetings Dept., 1000 Wilson Blvd., Ste. 1825, Arlington, VA 22209; (703) 907-7822.

## OCTOBER

**October 7–11**, 15th World Congress on Psychiatric Genetics, New York. Contact: Lynn E DeLisi, International Society of Psychiatric Genetics, NYU School of Medicine, 650 First Avenue, 5th Floor Room 543, New York, NY 10016; (212) 263-3420 (tel), (212) 263-3407 (fax).

**October 11–14**, 59th Institute on Psychiatric Services, American Psychiatric Association, New Orleans, LA. Contact: Jill Gruber, APA Annual Meetings Dept., 1000 Wilson Blvd., Ste. 1825, Arlington, VA 22209; (703) 907-7815.

**October 12–15**, Annual Meeting of the Society for the Study of Psychiatry and Culture (SSPC), Hyatt Regency Capitol Hill, Washington, DC. Contact: Jim Boehnlein or Shannon Squire, (503) 220-3481, [shannon.squire@med.va.gov](mailto:shannon.squire@med.va.gov) (e-mail).

**October 23–28**, 54th Annual Meeting of the American Academy of Child and Adolescent Psychiatry, Boston. Contact: AACAP, 3615 Wisconsin Avenue, N.W., Washington, DC 20016-3007; (202) 966-7300 (tel), (202) 966-2891 (fax), [meetings@aacap.org](mailto:meetings@aacap.org) (e-mail), [www.aacap.org](http://www.aacap.org) (web site).

## FEBRUARY 2008

**February 15–18**, 21st Annual Meeting of the American Association for Geriatric Psychiatry, Washington, DC. Contact: AAGP, 7910 Woodmont Ave., Ste. 1050, Bethesda, MD 20814-3004; (301) 654-7850 (tel), (301) 654-4137 (fax), [www.aagpmeeting.org](http://www.aagpmeeting.org) (web site).

**February 27–March 2**, Annual meeting of the American College of Psychiatrists, Kauai, Hawaii. Contact: American

*Continued on page A28*

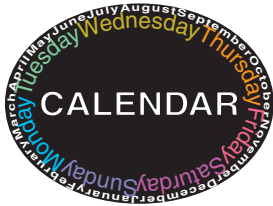

Continued from page A18

College of Psychiatrists, 122 S. Michigan Ave., Ste. 1360, Chicago, IL 60603; (312) 662-1020 (tel), (312) 662-1025 (fax), maureen@acpsych.org (e-mail).

## MAY

**May 1–4**, The 52nd Annual Meeting of the American Academy of Psychoanalysis and Dynamic Psychiatry, Washington, DC. Contact: Executive Office, American Academy of Psychoanalysis and Dynamic Psychiatry, P. O. Box 30, Bloomfield, CT 06002; (888) 691-8281 (tel), (888) 286-0787 (fax), aap@ssmgt.com (e-mail).

## CONTENTS (Continued from page A5)

### Disclosure of Competing Interests

181

### Continuing Medical Education

182

### Other Items of Interest

**A2** How to Activate Your Online Subscription

**A15** Officers of the American Psychiatric Association

**A18** Calendar

**A33** Information for Authors

**A53** *The British Journal of Psychiatry* contents (December 2006)

**A58** Index to Advertisers

### Cover

Does a disrupted perception of motivational drive impair self-control in cocaine abusers? Goldstein et al. (p. 43) used fMRI to measure brain activation in subjects performing a forced-choice task under three monetary value conditions. Compared with healthy subjects, cocaine abusers demonstrated an overall reduced regional brain responsivity to differences of monetary value. Additionally, objective and subjective measures of motivation were not correlated, suggesting disrupted perception of their own drive. Cover image provided by Dr. Goldstein, Linda Thomas, and National Institute on Drug Abuse Director, Nora Volkow.

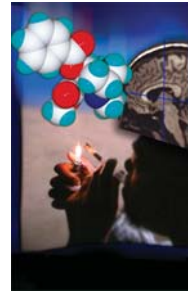

## Coming in the February 2007 issue

### THE AMERICAN JOURNAL OF PSYCHIATRY

#### *Physiologic Reactivity Despite Emotional Resilience Several Years After Direct Exposure to Terrorism*

P. Tucker, B. Pfefferbaum, C.S. North, A. Kent, C. Burgin, D.E. Parker, A. Hossain, H. Jeon-Slaughter, and R.P. Trautman

#### *Mood-Incongruent Psychotic Features in Bipolar Disorder: Familial Aggregation and Linkage to 2p11-q14 and 13q21-33*

J.B. Potash, G.S. Fernando, P.P. Zandi, K. Miao, F.J. McMahon, J. Steele, V.L. Willour, D.F. MacKinnon, F.M. Mondimore, B. Schweizer, J.I. Nurnberger, J.P. Rice, W. Scheftner, W. Coryell, W.H. Berrettini, J.R. Kelsoe, W. Byerley, D.L. Murphy, E.S. Gershon, and J.R. DePaulo

#### *Genetics of Recurrent Early-Onset Major Depression (GenRED): Final Genome Scan Report*

D.F. Levinson, P. Holmans, M.M. Weissman, G.S. Zubenko, W.A. Scheftner, R.R. Crowe, J.R. DePaulo, Jr., J.A. Knowles, W.N. Zubenko, K. Murphy-Eberenz, D.H. Marta, S. Boutelle, M.G. McInnis, P. Adams, M. Gladis, J. Steele, E.B. Miller, J.B. Potash, and D.F. MacKinnon

#### *Genetics of Recurrent Early-Onset Major Depression (GenRED): Significant Linkage on Chromosome 15q25-q26 After Fine-Mapping With SNP markers*

D.F. Levinson, O.V. Evgrafov, J.A. Knowles, J.B. Potash, M.M. Weissman, W.A. Scheftner, J.R. DePaulo, R.R. Crowe, K. Murphy-Eberenz, M.G. McInnis, P. Adams, M. Gladis, E.B. Miller, J. Thomas, and P. Holmans



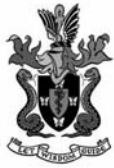

# THE BRITISH JOURNAL OF PSYCHIATRY

December 2006, VOL. 189

<http://bjp.rcpsych.org>

A20 Editorial Board

A21 Highlights of this issue

A22 Psychiatry in pictures

## EDITORIALS

479 **Smoke-free legislation and mental health units: the challenges ahead**  
K. Jochelson

481 **Distress and fear disorders: an alternative empirically based taxonomy of the 'mood' and 'anxiety' disorders**  
L.A. Clark and D. Watson

## REVIEW ARTICLE

484 **Collaborative care for depression in primary care. Making sense of a complex intervention: systematic review and meta-regression**  
P. Bower, S. Gilbody, D. Richards, J. Fletcher, and A. Sutton

## PAPERS

494 **Treatment options in moderate and severe depression: decision analysis supporting a clinical guideline**  
J. Simon, S. Pilling, R. Burbeck, and D. Goldberg

502 **Perinatal circumstances and risk of offspring suicide. Birth cohort study**  
D.V. Riordan, S. Selvaraj, C. Stark, and J.S.E. Gilbert

508 **Adherence therapy for people with schizophrenia. European multicentre randomised controlled trial**  
R. Gray, M. Leese, J. Bindman, T. Becker, L. Burti, A. David, K. Gournay, M. Kikkert, M. Koeter, B. Puschner, A. Schene, G. Thornicroft, and M. Tansella

515 **Influence of sub-syndromal symptoms after remission from manic or mixed episodes**  
M. Tohen, C.L. Bowden, J.R. Calabrese, D. Lin, T.D. Forrester, G.S. Sachs, A. Koukopoulos, L. Yatham, and H. Grunze

520 **Predicting community violence from patients discharged from mental health services**  
M. Doyle and M. Dolan

527 **Group cognitivebehavioural therapy for schizophrenia. Randomised controlled trial**  
C. Barrowclough, G. Haddock, F. Lobban, S. Jones, R. Siddle, C. Roberts, and L. Gregg

533 **Facial emotion processing in criminal psychopathy. Preliminary functional magnetic resonance imaging study**

Q. Deeley, E. Daly, S. Surguladze, N. Tunstall, G. Mezey, D. Beer, A. Ambikapathy, D. Robertson, V. Giampietro, M.J. Brammer, A. Clarke, J. Dowsett, T. Fahy, M.L. Phillips, and D.G. Murphy

540 **Structure of internalising symptoms in early adulthood**

D.M. Fergusson, L.J. Horwood, and J.M. Boden

547 **Risk factors for common mental disorders in women. Population-based longitudinal study**

V. Patel, B.R. Kirkwood, S. Pednekar, H. Weiss, and D. Mabey

## SHORT REPORTS

556 **Long-term course of cognitive impairment in schizophrenia**

G. Morrison, R. O'Carroll, and R. McCreadie

558 **Delayed early proprioceptive information processing in schizophrenia**

S.M. Arnfred, R.P. Hemmingsen, and J. Parnas

560 **Processing facial emotions in adults with velo-cardio-facial syndrome: functional magnetic resonance imaging**

T. van Amelsvoort, N. Schmitz, E. Daly, Q. Deeley, H. Critchley, J. Henry, D. Robertson, M. Owen, K.C. Murphy, and D.G. Murphy

562 **Urbanisation and the incidence of eating disorders**

G.E. van Son, D. van Hoeken, A.I.M. Bartelds, E.F. van Furth, and H.W. Hoek

## COLUMNS

564 Correspondence

568 One hundred years ago

569 Corrigenda

570 Book reviews

572 Books received

574 Contents of the *American Journal of Psychiatry*

575 Contents of *Advances in Psychiatric Treatment*

576 From the Editor's desk
